# Supplementary material for: Live and ultrasound-inactivated Lacticaseibacillus casei modulate the intestinal microbiota and improve biochemical and cardiovascular parameters in male rats fed a high-fat diet
Source: Royal Society of Chemistry journal article supplement (doi:10.1039/d1fo01064f), 2021-01-01
Supplement: d1fo01064f1.pdf [file d1fo01064f1.pdf]

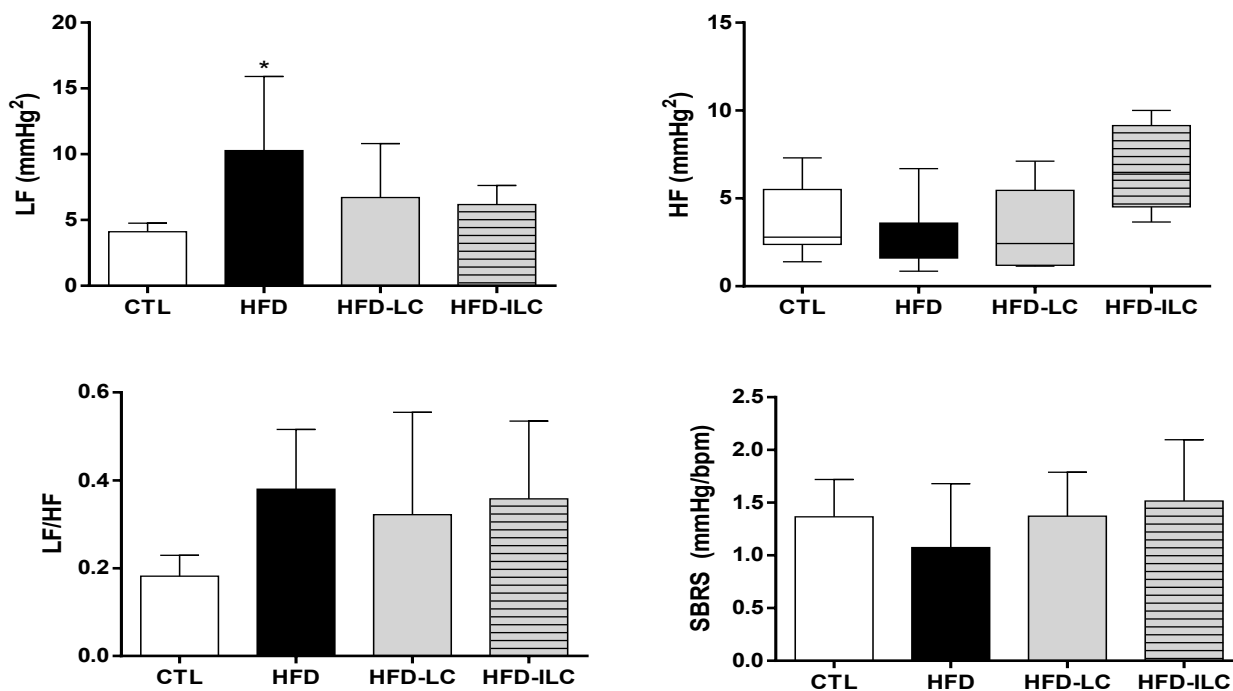

**Figure S1.** Effect of *L. casei* and ultrasound-inactivated *L. casei* on low-frequency waves (LF), high-frequency waves (HF), LF/HF, and spontaneous baroreflex sensitivity (SBRS). Groups: CTL group, HFD group, HFD-LC group and HFD-ILC group. Values are average SD. \*,  $p < 0.05$  versus CTL group; #,  $p < 0.05$  versus HFD group, using one-way ANOVA and post hoc test from Turkey.

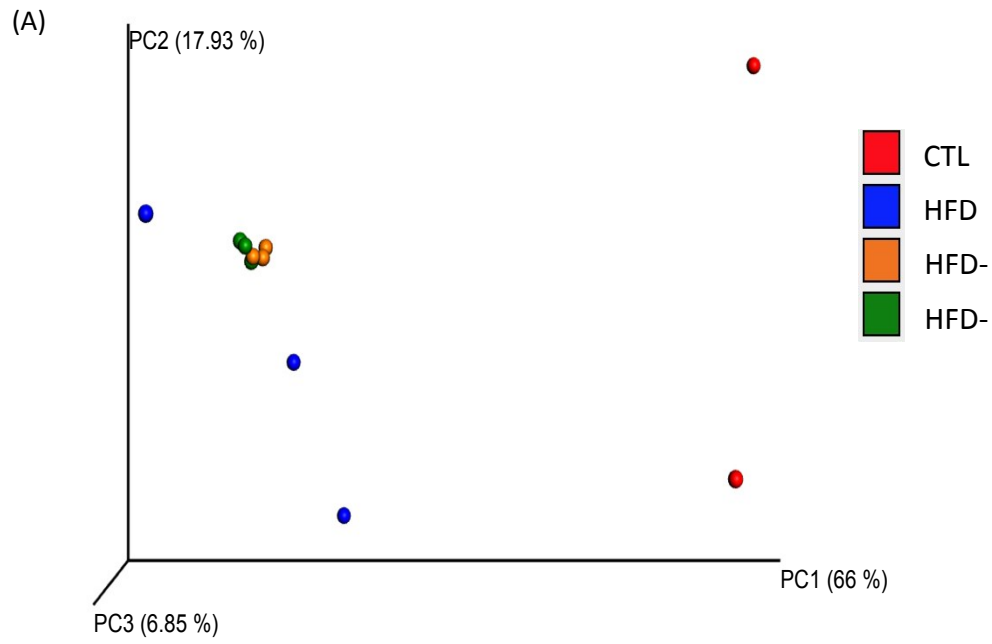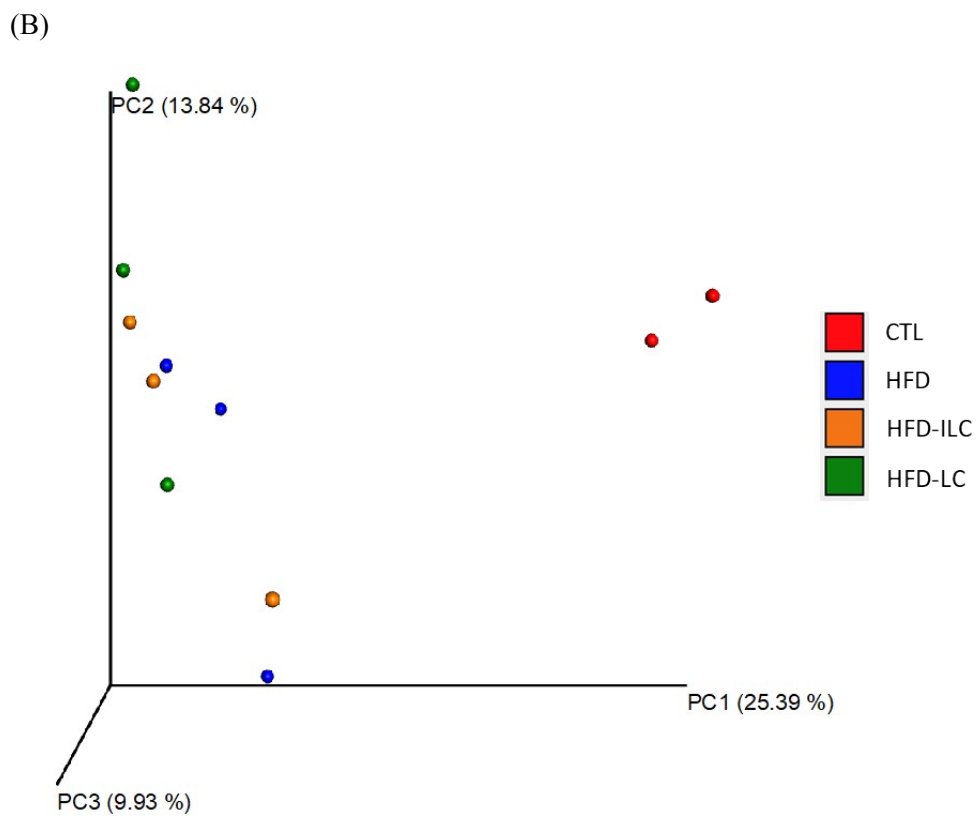

**Figure S2.** Weighted (A) and non-weighted (B) data of beta-diversity. Groups: control group (CTL), high-fat diet group (HFD), high-fat diet + *L. casei* (HFD-LC) and high-fat diet + ultrasound-inactivated *L. casei* (HFD-ILC).

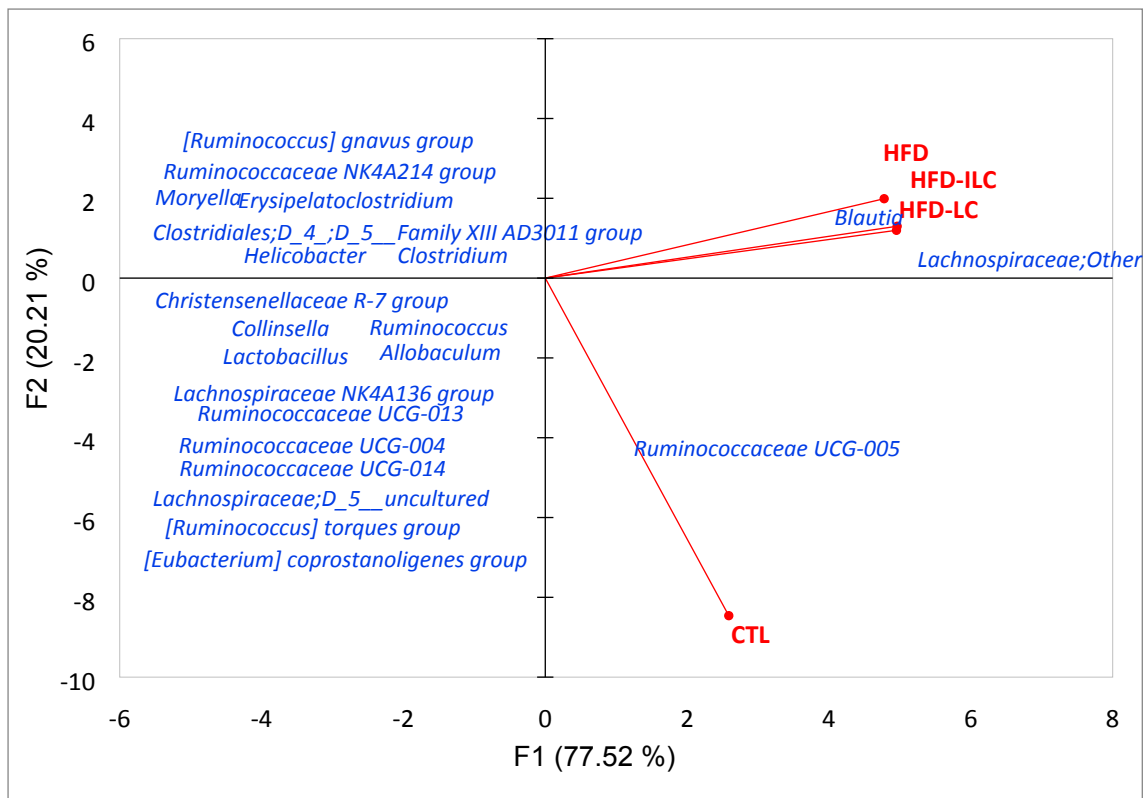

**Figure S3.** Principal component analysis at bacterial order and the family level with relative abundance obtained by 16S rRNA gene pyrosequencing analysis. Only OTUs with abundance values above 0.1% in at least three samples are shown. Groups: control group (CTL), high-fat diet group (HFD), high-fat diet + *L. casei* (HFD-LC) and high-fat diet + ultrasound-inactivated *L. casei* (HFD-ILC).
