# Supplementary material for: Live and ultrasound-inactivated Lacticaseibacillus casei modulate the intestinal microbiota and improve biochemical and cardiovascular parameters in male rats fed a high-fat diet
Source: Royal Society of Chemistry journal article supplement (doi:10.1039/d1fo01064f), 2021-01-01
Supplement: d1fo01064f2.pdf [file d1fo01064f2.pdf]

**Table S1.** Composition of control and high-fat diets.

| Ingredients (g per 100 g)    | Control (AIN-93M) <sup>a</sup> | High-fat <sup>b</sup> |
|------------------------------|--------------------------------|-----------------------|
| Milky Casein                 | 14.00                          | 19.86                 |
| Maize Starch                 | 47.00                          | 33.59                 |
| Dextrinized Starch           | 15.50                          | 15.50                 |
| Sucrose                      | 10.00                          | 6.00                  |
| Soy Oil                      | 4.00                           | 3.00                  |
| Fibers                       | 5.00                           | 5.00                  |
| Animal Fat (lard)            | -                              | 6.00                  |
| Non-hydrolyzed Vegetable Fat | -                              | 5.00                  |
| Sigma Cholic Acid            | -                              | 0.50                  |
| Cholesterol Sigma            | -                              | 1.00                  |
| 93M mineral mix              | 3.50                           | 3.50                  |
| Vitamin mix                  | 1.00                           | 1.00                  |
| L-Cystine                    | 0.18                           | 0.30                  |
| Choline Bitartrate           | 0.25                           | 0.25                  |
| T-BHQ <sup>c</sup>           | 0.08                           | 0.08                  |

<sup>a</sup>Reeves; Nielsen; Fahey (1993). <sup>b</sup>Rhoster – Industry and Trade Ltd. <sup>c</sup>t-BHQ: tert-butylhydroquinone.

**Table S2.** Samples, NCBI Biosample accession, code and sequences quality filters applied by Trimmomatic (0.36) software

| <b>Sequence File ID</b> | <b>NCBI Biosample accession</b> | <b>Code</b> | <b>Average of Raw Data (Each pair)</b> | <b>Quality-filtering</b> |
|-------------------------|---------------------------------|-------------|----------------------------------------|--------------------------|
| 200609105453            | SAMN18570499                    | CTL-1       | 134028                                 | 121163                   |
| 200609105455            | SAMN18570500                    | CTL-3       | 116862                                 | 104973                   |
| 200515181656            | SAMN18570501                    | HFD-1       | 230696                                 | 201269                   |
| 200609105456            | SAMN18570600                    | HDF-2       | 109064                                 | 97333                    |
| 200609105457            | SAMN18570631                    | HDF-3       | 142628                                 | 127367                   |
| 200515181657            | SAMN18570632                    | HFD-LC-1    | 450567                                 | 399927                   |
| 200515181664            | SAMN18570656                    | HFD-LC-2    | 381000                                 | 338604                   |
| 200515181659            | SAMN18570661                    | HFD-LC-3    | 112716                                 | 100358                   |
| 200515181660            | SAMN18570662                    | HFD-ILC-1   | 138942                                 | 119844                   |
| 200515181661            | SAMN18570677                    | HFD-ILC-2   | 116572                                 | 100316                   |
| 200515181662            | SAMN18570678                    | HFD-ILC-3   | 197866                                 | 171687                   |

Groups: control group (CTL), high-fat diet group (HFD), high-fat diet + *L. casei* (HFD-LC) and high-fat diet + ultrasound-inactivated *L. casei* (HFD-ILC).

**Table S3.** Permanova statistical analysis from beta-diversity data using Adonis script in QIIME.

|                                   | <b>Df</b> | <b>SumsOfSq</b> | <b>MeanSqs</b> | <b>F.Mode</b> | <b>R2</b> | <b>Pr(&gt;F)</b> |
|-----------------------------------|-----------|-----------------|----------------|---------------|-----------|------------------|
|                                   |           | <b>s</b>        |                | <b>l</b>      |           |                  |
| qiime.data\$map[[opts\$category]] | 3         | 1.1809          | 0.39365        | 1.7739        | 0.4319    | 0.003 **         |
| Residuals                         | 7         | 1.5534          | 0.22191        |               | 0.5681    |                  |
| Total                             | 10        | 2.7343          |                |               | 1.0000    |                  |

Signif. codes: 0 '\*\*\*' 0.001 '\*\*' 0.01 '\*' 0.05 '.' 0.1 ' ' 1

**Table S4.** Relative abundance of bacterial family inferred from 16S rRNA gene sequencing analysis in fecal samples of rats fed standard diet and rats fed high-fat diet receiving or not live and ultrasound-inactivated *Lacticaseibacillus casei*.

| <b>Family</b>                     | <b>CTL</b>               | <b>HFD</b>               | <b>HFD-LC</b>           | <b>HFD-ILC</b>           |
|-----------------------------------|--------------------------|--------------------------|-------------------------|--------------------------|
| <i>Lachnospiraceae</i>            | 33.5 ± 17.0 <sup>d</sup> | 77.5 ± 10.6 <sup>c</sup> | 95.2 ± 2.4 <sup>a</sup> | 91.3 ± 4.0 <sup>bc</sup> |
| <i>Ruminococcaceae</i>            | 47.0 ± 20.2 <sup>a</sup> | 2.8 ± 1.7 <sup>b</sup>   | 1.3 ± 1.0 <sup>b</sup>  | 3.2 ± 3.0 <sup>b</sup>   |
| <i>Christensenellaceae</i>        | 2.8 ± 2.3 <sup>a</sup>   | 7.8 ± 12.9 <sup>a</sup>  | 1.0 ± 1.0 <sup>a</sup>  | 0.7 ± 1.2 <sup>a</sup>   |
| <i>Erysipelotrichaceae</i>        | 5.7 ± 3.9 <sup>a</sup>   | 3.0 ± 2.6 <sup>ab</sup>  | 0.5 ± 0.2 <sup>b</sup>  | 1.2 ± 0.3 <sup>ab</sup>  |
| <i>Clostridiales; Family XIII</i> | 0.9 ± 0.4 <sup>a</sup>   | 1.6 ± 1.7 <sup>a</sup>   | 0.6 ± 0.5 <sup>a</sup>  | 0.6 ± 0.3 <sup>a</sup>   |
| <i>Clostridiaceae 1</i>           | 0.0 ± 0.0 <sup>c</sup>   | 2.3 ± 1.0 <sup>a</sup>   | 0.4 ± 0.1 <sup>b</sup>  | 1.1 ± 0.9 <sup>b</sup>   |
| <i>Peptostreptococcaceae</i>      | 0.0 ± 0.0 <sup>c</sup>   | 0.6 ± 0.4 <sup>a</sup>   | 0.2 ± 0.1 <sup>bc</sup> | 0.2 ± 0.2 <sup>ab</sup>  |
| <i>Coriobacteriaceae</i>          | 0.6 ± 0.4 <sup>a</sup>   | 0.8 ± 0.8 <sup>a</sup>   | 0.2 ± 0.2 <sup>a</sup>  | 0.3 ± 0.1 <sup>a</sup>   |
| <i>Clostridiales; Other</i>       | 0.1 ± 0.1 <sup>a</sup>   | 0.1 ± 0.1 <sup>a</sup>   | 0.1 ± 0.1 <sup>a</sup>  | 0.1 ± 0.1 <sup>a</sup>   |
| <i>Enterobacteriaceae</i>         | 0.0 ± 0.0 <sup>b</sup>   | 1.3 ± 2.1 <sup>a</sup>   | 0.1 ± 0.0 <sup>a</sup>  | 0.1 ± 0.1 <sup>a</sup>   |
| <i>Methanobacteriaceae</i>        | 1.8 ± 1.6 <sup>a</sup>   | 0.0 ± 0.0 <sup>b</sup>   | 0.0 ± 0.0 <sup>b</sup>  | 0.0 ± 0.0 <sup>b</sup>   |
| <i>Muribaculaceae</i>             | 3.0 ± 0.4 <sup>a</sup>   | 0.0 ± 0.0 <sup>b</sup>   | 0.0 ± 0.0 <sup>b</sup>  | 0.0 ± 0.1 <sup>b</sup>   |
| <i>Prevotellaceae</i>             | 0.4 ± 0.2 <sup>a</sup>   | 0.0 ± 0.0 <sup>b</sup>   | 0.0 ± 0.0 <sup>b</sup>  | 0.0 ± 0.1 <sup>b</sup>   |
| <i>Helicobacteraceae</i>          | 0.2 ± 0.0 <sup>a</sup>   | 0.8 ± 1.2 <sup>a</sup>   | 0.0 ± 0.0 <sup>b</sup>  | 0.0 ± 0.0 <sup>b</sup>   |

\*Average ± SD. Different letters in the same line means significant difference ( $p < 0.05$ ) among treatments by Kruskal-wallis test. Treatments: control group (CTL), high fat diet group (HFD), high fat diet + *L. casei* (HFD-LC) and high fat diet + ultrasound-inactivated *L. casei* (HFD-ILC).
